# Supplementary material for: Conjunctive Analyses of BSA-Seq and BSR-Seq to Reveal the Molecular Pathway of Leafy Head Formation in Chinese Cabbage
Source: Plants (Basel). 2019 Dec 13;8(12):603. doi: 10.3390/plants8120603 (PMC6963953; doi:10.3390/plants8120603)
Supplement: Supplementary file 1 [file plants-08-00603-s001.zip › Supplementary Table.xlsx]

## Sheet: Table S1
Table S1. Difference expression genes assigned 5 plant signaling pathways
Comparison group	Pathway	Gene_ID	Hormologous gene in Arabidopsis	Up/Down	GO_annotation	KEGG_annotation	Swissprot_annotation
T03 vs T04	Auxin	Bra008615	AT5G16530	up	Cellular Component: endoplasmic reticulum (GO:0005783);; Cellular Component: plasma membrane (GO:0005886);; Biological Process: pollen development (GO:0009555);; Molecular Function: auxin:proton symporter activity (GO:0009672);; Biological Process: auxin polar transport (GO:0009926);; Biological Process: auxin homeostasis (GO:0010252);; Biological Process: auxin efflux (GO:0010315);; Molecular Fu…	K13947|0.0|ath:AT5G16530|PIN5; PIN5 (PIN-FORMED 5); auxin:hydrogen symporter/ transporter; K13947 auxin efflux carrier family	Putative auxin efflux carrier component 8 GN=MQK4.28 OS=Arabidopsis thaliana (Mouse-ear cress) PE=3 SV=2
		Bra010354	AT4G28720	down	Molecular Function: N,N-dimethylaniline monooxygenase activity (GO:0004499);; Biological Process: brassinosteroid mediated signaling pathway (GO:0009742);; Biological Process: auxin biosynthetic process (GO:0009851);; Molecular Function: flavin adenine dinucleotide binding (GO:0050660);; Molecular Function: NADP binding (GO:0050661);; Biological Process: oxidation-reduction process (GO:0055114);;	K11816|0.0|ath:AT4G28720|flavin-containing monooxygenase family protein / FMO family protein	Probable indole-3-pyruvate monooxygenase YUCCA8 GN=F16A16.170 OS=Arabidopsis thaliana (Mouse-ear cress) PE=2 SV=1
		Bra011055	AT4G28720	down	Molecular Function: N,N-dimethylaniline monooxygenase activity (GO:0004499);; Biological Process: brassinosteroid mediated signaling pathway (GO:0009742);; Biological Process: auxin biosynthetic process (GO:0009851);; Molecular Function: flavin adenine dinucleotide binding (GO:0050660);; Molecular Function: NADP binding (GO:0050661);; Biological Process: oxidation-reduction process (GO:0055114);;	K11816|0.0|ath:AT4G28720|flavin-containing monooxygenase family protein / FMO family protein	Probable indole-3-pyruvate monooxygenase YUCCA8 GN=F16A16.170 OS=Arabidopsis thaliana (Mouse-ear cress) PE=2 SV=1
		Bra026365	AT4G27260	down	Cellular Component: chloroplast (GO:0009507);; Biological Process: auxin-activated signaling pathway (GO:0009734);; Biological Process: unidimensional cell growth (GO:0009826);; Biological Process: auxin homeostasis (GO:0010252);; Molecular Function: indole-3-acetic acid amido synthetase activity (GO:0010279);; Biological Process: response to cyclopentenone (GO:0010583);; Biological Process: posi…	K14487|0.0|ath:AT4G27260|WES1; WES1; indole-3-acetic acid amido synthetase; K14487 auxin responsive GH3 gene family	Indole-3-acetic acid-amido synthetase GH3.5 GN=GH3.5 OS=Arabidopsis thaliana (Mouse-ear cress) PE=1 SV=1
		Bra019060	AT4G27260	down	Cellular Component: chloroplast (GO:0009507);; Biological Process: auxin-activated signaling pathway (GO:0009734);; Biological Process: unidimensional cell growth (GO:0009826);; Biological Process: auxin homeostasis (GO:0010252);; Molecular Function: indole-3-acetic acid amido synthetase activity (GO:0010279);; Biological Process: response to cyclopentenone (GO:0010583);; Biological Process: posi…	K14487|0.0|ath:AT4G27260|WES1; WES1; indole-3-acetic acid amido synthetase; K14487 auxin responsive GH3 gene family	Indole-3-acetic acid-amido synthetase GH3.5 GN=GH3.5 OS=Arabidopsis thaliana (Mouse-ear cress) PE=1 SV=1
		Bra019921	AT5G51470	down	Cellular Component : cytoplasm, nucleus;; Molecular Function : acid-amino acid ligase activity	K14487|0.0|ath:AT5G51470|auxin-responsive GH3 family protein; K14487 auxin responsive GH3 gene family
		Bra013630	AT4G22620	up	Cellular Component: mitochondrion (GO:0005739);; Biological Process: response to auxin (GO:0009733);;	K14488|1e-101|ath:AT4G22620|auxin-responsive family protein; K14488 SAUR family protein	Auxin-induced protein X10A OS=Glycine max (Soybean) PE=2 SV=1
		Bra039345	AT3G12830	up	Biological Process: response to auxin (GO:0009733);;	K14488|8e-77|ath:AT3G12830|auxin-responsive family protein; K14488 SAUR family protein	Auxin-induced protein X15 OS=Glycine max (Soybean) PE=2 SV=1
		Bra017211	AT2G37030	up	Biological Process: response to auxin (GO:0009733);;	K14488|1e-65|ath:AT2G37030|auxin-responsive family protein; K14488 SAUR family protein	Indole-3-acetic acid-induced protein ARG7 GN=ARG7 OS=Vigna radiata var. radiata (Mung bean) PE=2 SV=1
		Bra037243	AT2G18010	down	Biological Process: response to auxin (GO:0009733);;	K14488|1e-63|ath:AT2G18010|auxin-responsive family protein; K14488 SAUR family protein	Indole-3-acetic acid-induced protein ARG7 GN=ARG7 OS=Vigna radiata var. radiata (Mung bean) PE=2 SV=1
		Bra011662	AT4G36110	down	Biological Process: response to auxin (GO:0009733);;	K14488|7e-64|ath:AT4G36110|auxin-responsive protein, putative; K14488 SAUR family protein	Auxin-induced protein 15A OS=Glycine max (Soybean) PE=2 SV=1
		Bra011891	AT4G38840	down	Cellular Component: plasma membrane (GO:0005886);; Biological Process: response to cold (GO:0009409);; Cellular Component: chloroplast (GO:0009507);; Biological Process: response to auxin (GO:0009733);; Biological Process: defense response to bacterium (GO:0042742);;	K14488|3e-54|ath:AT4G38840|auxin-responsive protein, putative; K14488 SAUR family protein	Auxin-induced protein 10A5 OS=Glycine max (Soybean) PE=2 SV=1
		Bra008207	AT1G75580	down	Biological Process: response to auxin (GO:0009733);;	K14488|2e-61|ath:AT1G75580|auxin-responsive protein, putative; K14488 SAUR family protein	Auxin-induced protein X10A OS=Glycine max (Soybean) PE=2 SV=1
		Bra007661	AT3G62100	up	Molecular Function: transcription factor activity, sequence-specific DNA binding (GO:0003700);; Cellular Component: nucleus (GO:0005634);; Biological Process: regulation of transcription, DNA-templated (GO:0006355);; Biological Process: gravitropism (GO:0009630);; Biological Process: auxin-activated signaling pathway (GO:0009734);; Biological Process: somatic embryogenesis (GO:0010262);; Biologic…	K14484|1e-109|ath:AT3G62100|IAA30; IAA30 (INDOLE-3-ACETIC ACID INDUCIBLE 30); transcription factor	Auxin-responsive protein IAA30 GN=IAA30 OS=Arabidopsis thaliana (Mouse-ear cress) PE=2 SV=1
		Bra035185	AT1G80390	up	Molecular Function: transcription factor activity, sequence-specific DNA binding (GO:0003700);; Cellular Component: nucleus (GO:0005634);; Biological Process: regulation of transcription, DNA-templated (GO:0006355);; Biological Process: auxin-activated signaling pathway (GO:0009734);; Molecular Function: protein dimerization activity (GO:0046983);;	K14484|2e-84|ath:AT1G80390|IAA15; IAA15 (INDOLE-3-ACETIC ACID INDUCIBLE 15); transcription factor	Auxin-responsive protein IAA15 GN=IAA15 OS=Arabidopsis thaliana (Mouse-ear cress) PE=2 SV=1
		Bra024187	AT4G28640	up	Molecular Function: transcription factor activity, sequence-specific DNA binding (GO:0003700);; Cellular Component: nucleus (GO:0005634);; Biological Process: regulation of transcription, DNA-templated (GO:0006355);; Cellular Component: plasmodesma (GO:0009506);; Cellular Component: photosystem II oxygen evolving complex (GO:0009654);; Biological Process: auxin-activated signaling pathway (GO:000…	K14484|1e-117|ath:AT4G28640|IAA11; IAA11 (INDOLE-3-ACETIC ACID INDUCIBLE 11); transcription factor	Auxin-responsive protein IAA11 GN=IAA11 OS=Arabidopsis thaliana (Mouse-ear cress) PE=1 SV=1
		Bra032521	AT1G04240	down	Molecular Function: transcription factor activity, sequence-specific DNA binding (GO:0003700);; Cellular Component: nucleus (GO:0005634);; Biological Process: regulation of transcription, DNA-templated (GO:0006355);; Biological Process: auxin-activated signaling pathway (GO:0009734);; Biological Process: response to brassinosteroid (GO:0009741);; Molecular Function: transcription regulatory regio…	K14484|1e-112|ath:AT1G04240|SHY2; SHY2 (SHORT HYPOCOTYL 2); transcription factor; K14484 auxin-responsive protein IAA	Auxin-responsive protein IAA3 GN=F19P19.32 OS=Arabidopsis thaliana (Mouse-ear cress) PE=1 SV=1
		Bra026755	AT1G15580	down	Molecular Function: transcription factor activity, sequence-specific DNA binding (GO:0003700);; Cellular Component: nucleus (GO:0005634);; Biological Process: regulation of transcription, DNA-templated (GO:0006355);; Biological Process: auxin-activated signaling pathway (GO:0009734);; Biological Process: response to brassinosteroid (GO:0009741);; Biological Process: response to cyclopentenone (GO…	K14484|2e-91|ath:AT1G15580|IAA5; IAA5 (INDOLE-3-ACETIC ACID INDUCIBLE 5); transcription factor	Auxin-responsive protein IAA5 GN=T16N11.9 OS=Arabidopsis thaliana (Mouse-ear cress) PE=2 SV=3
		Bra023958	AT4G32280	down	Molecular Function: transcription factor activity, sequence-specific DNA binding (GO:0003700);; Cellular Component: nucleus (GO:0005634);; Biological Process: regulation of transcription, DNA-templated (GO:0006355);; Biological Process: auxin-activated signaling pathway (GO:0009734);; Biological Process: response to red light (GO:0010114);; Biological Process: response to far red light (GO:001021…	K14484|1e-125|ath:AT4G32280|IAA29; IAA29 (INDOLE-3-ACETIC ACID INDUCIBLE 29); transcription factor	Auxin-responsive protein IAA29 GN=IAA29 OS=Arabidopsis thaliana (Mouse-ear cress) PE=2 SV=2
		Bra011955	AT2G28350	down	Molecular Function: DNA binding (GO:0003677);; Molecular Function: transcription factor activity, sequence-specific DNA binding (GO:0003700);; Cellular Component: nucleus (GO:0005634);; Biological Process: regulation of transcription, DNA-templated (GO:0006355);; Biological Process: pattern specification process (GO:0007389);; Biological Process: auxin-activated signaling pathway (GO:0009734);; B…	--	Auxin response factor 10 GN=ARF10 OS=Arabidopsis thaliana (Mouse-ear cress) PE=2 SV=1
		Bra004530	AT2G46530	down	Molecular Function: transcription factor activity, sequence-specific DNA binding (GO:0003700);; Cellular Component: nucleus (GO:0005634);; Biological Process: regulation of transcription, DNA-templated (GO:0006355);; Biological Process: cell adhesion (GO:0007155);; Cellular Component: plasmodesma (GO:0009506);; Biological Process: response to ethylene (GO:0009723);; Biological Process: auxin-acti…	--	Auxin response factor 11 GN=ARF11 OS=Arabidopsis thaliana (Mouse-ear cress) PE=2 SV=3
	Ethylene	Bra021594	AT3G15210	up	Biological Process: respiratory burst involved in defense response (GO:0002679);; Molecular Function: DNA binding (GO:0003677);; Molecular Function: transcription factor activity, sequence-specific DNA binding (GO:0003700);; Molecular Function: protein binding (GO:0005515);; Biological Process: response to abscisic acid (GO:0009737);; Biological Process: induced systemic resistance, jasmonic acid…	K09286|1e-111|ath:AT3G15210|ERF4; ERF4 (ETHYLENE RESPONSIVE ELEMENT BINDING FACTOR 4); DNA binding / protein binding / transcription factor/ transcription repressor; K09286 EREBP-like factor	Ethylene-responsive transcription factor 4 GN=At3g15210 OS=Arabidopsis thaliana (Mouse-ear cress) PE=1 SV=1
		Bra023756	AT3G23150	down	Molecular Function: phosphorelay sensor kinase activity (GO:0000155);; Molecular Function: phosphorelay response regulator activity (GO:0000156);; Molecular Function: protein serine/threonine kinase activity (GO:0004674);; Molecular Function: protein binding (GO:0005515);; Molecular Function: ATP binding (GO:0005524);; Cellular Component: endoplasmic reticulum membrane (GO:0005789);; Biological P…	K14509|0.0|ath:AT3G23150|ETR2; ETR2 (ethylene response 2); ethylene binding / glycogen synthase kinase 3/ protein histidine kinase/ receptor; K14509 ethylene receptor [EC:2.7.13.-]	Ethylene receptor 2 GN=ETR2 OS=Arabidopsis thaliana (Mouse-ear cress) PE=1 SV=2
		Bra017493	AT5G47230	down	Biological Process: respiratory burst involved in defense response (GO:0002679);; Molecular Function: DNA binding (GO:0003677);; Molecular Function: transcription factor activity, sequence-specific DNA binding (GO:0003700);; Cellular Component: nucleus (GO:0005634);; Biological Process: response to cold (GO:0009409);; Biological Process: ethylene-activated signaling pathway (GO:0009873);; Biologi…	K09286|1e-151|ath:AT5G47230|ERF5; ERF5 (ETHYLENE RESPONSIVE ELEMENT BINDING FACTOR 5); DNA binding / transcription activator/ transcription factor; K09286 EREBP-like factor	Ethylene-responsive transcription factor 5 GN=MQL5_9 OS=Arabidopsis thaliana (Mouse-ear cress) PE=2 SV=1
		Bra006325	AT5G44210	up	Molecular Function: DNA binding (GO:0003677);; Molecular Function: transcription factor activity, sequence-specific DNA binding (GO:0003700);; Cellular Component: nucleus (GO:0005634);; Biological Process: oligopeptide transport (GO:0006857);; Biological Process: ethylene-activated signaling pathway (GO:0009873);; Cellular Component: membrane (GO:0016020);; Biological Process: negative regulation…	K09286|3e-73|ath:AT5G44210|ERF9; ERF9 (ERF DOMAIN PROTEIN 9); DNA binding / transcription factor/ transcription repressor; K09286 EREBP-like factor	Ethylene-responsive transcription factor 9 GN=MLN1.14 OS=Arabidopsis thaliana (Mouse-ear cress) PE=2 SV=1
		Bra024953	AT5G47230	down	Biological Process: respiratory burst involved in defense response (GO:0002679);; Molecular Function: DNA binding (GO:0003677);; Molecular Function: transcription factor activity, sequence-specific DNA binding (GO:0003700);; Cellular Component: nucleus (GO:0005634);; Biological Process: response to cold (GO:0009409);; Biological Process: ethylene-activated signaling pathway (GO:0009873);; Biologi…	K09286|1e-142|ath:AT5G47230|ERF5; ERF5 (ETHYLENE RESPONSIVE ELEMENT BINDING FACTOR 5); DNA binding / transcription activator/ transcription factor; K09286 EREBP-like factor	Ethylene-responsive transcription factor 5 GN=MQL5_9 OS=Arabidopsis thaliana (Mouse-ear cress) PE=2 SV=1
	Abscisic acid	Bra005853	AT5G05440	down	Molecular Function: receptor activity (GO:0004872);; Molecular Function: protein binding (GO:0005515);; Cellular Component: nucleus (GO:0005634);; Cellular Component: cytoplasm (GO:0005737);; Biological Process: abscisic acid-activated signaling pathway (GO:0009738);; Molecular Function: abscisic acid binding (GO:0010427);;	K14496|1e-137|ath:AT5G05440|hypothetical protein; K14496 abscisic acid receptor PYR/PYL family	Abscisic acid receptor PYL5 GN=K18I23.25 OS=Arabidopsis thaliana (Mouse-ear cress) PE=1 SV=1
		Bra009113	AT5G05440	down	Molecular Function: receptor activity (GO:0004872);; Molecular Function: protein binding (GO:0005515);; Cellular Component: nucleus (GO:0005634);; Cellular Component: cytoplasm (GO:0005737);; Biological Process: abscisic acid-activated signaling pathway (GO:0009738);; Molecular Function: abscisic acid binding (GO:0010427);;	K14496|1e-144|ath:AT5G05440|hypothetical protein; K14496 abscisic acid receptor PYR/PYL family	Abscisic acid receptor PYL5 GN=K18I23.25 OS=Arabidopsis thaliana (Mouse-ear cress) PE=1 SV=1
		Bra005115	AT2G38310	down	Molecular Function: receptor activity (GO:0004872);; Cellular Component: nucleus (GO:0005634);; Cellular Component: cytoplasm (GO:0005737);; Biological Process: abscisic acid-activated signaling pathway (GO:0009738);; Molecular Function: abscisic acid binding (GO:0010427);; Molecular Function: protein homodimerization activity (GO:0042803);;	K14496|1e-100|ath:AT2G38310|hypothetical protein; K14496 abscisic acid receptor PYR/PYL family	Abscisic acid receptor PYL4 GN=T19C21.20 OS=Arabidopsis thaliana (Mouse-ear cress) PE=1 SV=1
		Bra029093	AT5G53160	down	Molecular Function: receptor activity (GO:0004872);; Cellular Component: nucleus (GO:0005634);; Cellular Component: mitochondrion (GO:0005739);; Biological Process: positive regulation of abscisic acid-activated signaling pathway (GO:0009789);; Molecular Function: abscisic acid binding (GO:0010427);; Molecular Function: protein homodimerization activity (GO:0042803);;	K14496|1e-116|ath:AT5G53160|hypothetical protein; K14496 abscisic acid receptor PYR/PYL family	Abscisic acid receptor PYL8 GN=MFH8.10 OS=Arabidopsis thaliana (Mouse-ear cress) PE=1 SV=1
		Bra000938	AT4G01026	down	Molecular Function: receptor activity (GO:0004872);; Cellular Component: nucleus (GO:0005634);; Cellular Component: cytoplasm (GO:0005737);; Biological Process: abscisic acid-activated signaling pathway (GO:0009738);; Biological Process: regulation of seed germination (GO:0010029);; Molecular Function: abscisic acid binding (GO:0010427);; Molecular Function: protein homodimerization activity (GO:…	K14496|1e-118|ath:AT4G01026|hypothetical protein; K14496 abscisic acid receptor PYR/PYL family	Abscisic acid receptor PYL7 GN=F3I3 OS=Arabidopsis thaliana (Mouse-ear cress) PE=1 SV=1
		Bra007820	AT2G25070	down	Molecular Function: protein serine/threonine phosphatase activity (GO:0004722);; Cellular Component: nucleus (GO:0005634);; Cellular Component: plasma membrane (GO:0005886);; Biological Process: protein dephosphorylation (GO:0006470);; Biological Process: response to symbiotic fungus (GO:0009610);; Biological Process: response to abscisic acid (GO:0009737);; Biological Process: cellular response …	K01090|0.0|ath:AT2G25070|protein phosphatase 2C, putative / PP2C, putative; K01090 protein phosphatase [EC:3.1.3.16]	Probable protein phosphatase 2C 21 GN=PPC4-2 OS=Arabidopsis thaliana (Mouse-ear cress) PE=1 SV=1
		Bra018800	AT1G49720	down	Molecular Function: transcription factor activity, sequence-specific DNA binding (GO:0003700);; Molecular Function: protein binding (GO:0005515);; Cellular Component: nucleus (GO:0005634);; Biological Process: circadian rhythm (GO:0007623);; Biological Process: response to xenobiotic stimulus (GO:0009410);; Biological Process: response to water deprivation (GO:0009414);; Biological Process: respo…	K14432|1e-175|ath:AT1G49720|ABF1; ABF1 (ABSCISIC ACID RESPONSIVE ELEMENT-BINDING FACTOR 1); DNA binding / protein binding / transcription activator/ transcription factor; K14432 ABA responsive element binding factor	ABSCISIC ACID-INSENSITIVE 5-like protein 4 GN=F14J22.7 OS=Arabidopsis thaliana (Mouse-ear cress) PE=1 SV=1
	Jasmonic acid	Bra000421	AT2G46370	up	Molecular Function: ATP binding (GO:0005524);; Cellular Component: nucleus (GO:0005634);; Cellular Component: vacuole (GO:0005773);; Biological Process: red, far-red light phototransduction (GO:0009585);; Biological Process: systemic acquired resistance (GO:0009627);; Biological Process: photomorphogenesis (GO:0009640);; Biological Process: jasmonic acid metabolic process (GO:0009694);; Biologica…	K14506|0.0|ath:AT2G46370|JAR1; JAR1 (JASMONATE RESISTANT 1); ATP binding / adenylyltransferase/ catalytic/ jasmonate-amino synthetase; K14506 jasmonic acid-amino synthetase	Jasmonic acid-amido synthetase JAR1 GN=F11C10.6 OS=Arabidopsis thaliana (Mouse-ear cress) PE=1 SV=2
		Bra025753	AT1G19640	up	Cellular Component: nucleus (GO:0005634);; Cellular Component: cytoplasm (GO:0005737);; Biological Process: protein targeting to membrane (GO:0006612);; Biological Process: response to water deprivation (GO:0009414);; Biological Process: response to wounding (GO:0009611);; Biological Process: response to fungus (GO:0009620);; Biological Process: jasmonic acid biosynthetic process (GO:0009695);; B…	K08241|0.0|ath:AT1G19640|JMT; JMT (JASMONIC ACID CARBOXYL METHYLTRANSFERASE); jasmonate O-methyltransferase; K08241 jasmonate O-methyltransferase [EC:2.1.1.141]	Jasmonate O-methyltransferase GN=JMT OS=Brassica rapa subsp. pekinensis (Chinese cabbage) PE=1 SV=1
	Gibberellin	Bra023513	AT5G15230	down	Cellular Component: extracellular region (GO:0005576);; Cellular Component: cell (GO:0005623);; Biological Process: gibberellic acid mediated signaling pathway (GO:0009740);; Biological Process: cysteine biosynthetic process (GO:0019344);; Biological Process: cell redox homeostasis (GO:0045454);;	--	Gibberellin-regulated protein 4 (Precursor) GN=GASA4 OS=Arabidopsis thaliana (Mouse-ear cress) PE=1 SV=2
		Bra006291	AT5G15230	down	Cellular Component: extracellular region (GO:0005576);; Cellular Component: cell (GO:0005623);; Biological Process: gibberellic acid mediated signaling pathway (GO:0009740);; Biological Process: cysteine biosynthetic process (GO:0019344);; Biological Process: cell redox homeostasis (GO:0045454);;	--	Gibberellin-regulated protein 4 (Precursor) GN=GASA4 OS=Arabidopsis thaliana (Mouse-ear cress) PE=1 SV=2
		Bra003743	AT1G75750	up	Biological Process: polysaccharide biosynthetic process (GO:0000271);; Cellular Component: extracellular region (GO:0005576);; Biological Process: tryptophan catabolic process (GO:0006569);; Biological Process: digestion (GO:0007586);; Molecular Function: enzyme activator activity (GO:0008047);; Cellular Component: plant-type cell wall (GO:0009505);; Biological Process: indoleacetic acid biosynth…	--	Gibberellin-regulated protein 1 (Precursor) GN=GASA1 OS=Arabidopsis thaliana (Mouse-ear cress) PE=2 SV=2
		Bra008362	AT1G78440	up	Molecular Function: iron ion binding (GO:0005506);; Cellular Component: cytoplasm (GO:0005737);; Biological Process: gibberellin biosynthetic process (GO:0009686);; Biological Process: gibberellin catabolic process (GO:0045487);; Molecular Function: C-19 gibberellin 2-beta-dioxygenase activity (GO:0052634);; Biological Process: oxidation-reduction process (GO:0055114);;	K04125|0.0|ath:AT1G78440|ATGA2OX1 (gibberellin 2-oxidase 1); gibberellin 2-beta-dioxygenase; K04125 gibberellin 2-oxidase [EC:1.14.11.13]	Gibberellin 2-beta-dioxygenase 1 GN=GA2OX1 OS=Arabidopsis thaliana (Mouse-ear cress) PE=2 SV=2
		Bra020890	AT4G21200	up	Cellular Component: cytoplasm (GO:0005737);; Biological Process: gibberellin biosynthetic process (GO:0009686);; Molecular Function: metal ion binding (GO:0046872);; Molecular Function: C-19 gibberellin 2-beta-dioxygenase activity (GO:0052634);; Molecular Function: C-20 gibberellin 2-beta-dioxygenase activity (GO:0052635);; Biological Process: oxidation-reduction process (GO:0055114);;	--	Gibberellin 2-beta-dioxygenase 8 GN=GA2OX8 OS=Arabidopsis thaliana (Mouse-ear cress) PE=1 SV=2
		Bra013512	AT4G21200	up	Cellular Component: cytoplasm (GO:0005737);; Biological Process: gibberellin biosynthetic process (GO:0009686);; Molecular Function: metal ion binding (GO:0046872);; Molecular Function: C-19 gibberellin 2-beta-dioxygenase activity (GO:0052634);; Molecular Function: C-20 gibberellin 2-beta-dioxygenase activity (GO:0052635);; Biological Process: oxidation-reduction process (GO:0055114);;	--	Gibberellin 2-beta-dioxygenase 8 GN=GA2OX8 OS=Arabidopsis thaliana (Mouse-ear cress) PE=1 SV=2
		Bra038780	AT4G21200	up	Cellular Component: cytoplasm (GO:0005737);; Biological Process: gibberellin biosynthetic process (GO:0009686);; Molecular Function: metal ion binding (GO:0046872);; Molecular Function: C-19 gibberellin 2-beta-dioxygenase activity (GO:0052634);; Molecular Function: C-20 gibberellin 2-beta-dioxygenase activity (GO:0052635);; Biological Process: oxidation-reduction process (GO:0055114);;	--	Gibberellin 2-beta-dioxygenase 8 GN=GA2OX8 OS=Arabidopsis thaliana (Mouse-ear cress) PE=1 SV=2
		Bra019165	AT4G25420	down	Molecular Function: iron ion binding (GO:0005506);; Cellular Component: cytoplasm (GO:0005737);; Biological Process: gibberellin biosynthetic process (GO:0009686);; Biological Process: abscisic acid biosynthetic process (GO:0009688);; Biological Process: response to abscisic acid (GO:0009737);; Biological Process: gibberellic acid mediated signaling pathway (GO:0009740);; Biological Process: embr…	K05282|0.0|ath:AT4G25420|GA20OX1; gibberellin 20-oxidase (EC:1.14.11.12); K05282 gibberellin 20-oxidase [EC:1.14.11.12]	Gibberellin 20 oxidase 1 GN=At4g25420 OS=Arabidopsis thaliana (Mouse-ear cress) PE=2 SV=2
		Bra022565	AT5G51810	down	Molecular Function: iron ion binding (GO:0005506);; Cellular Component: cytoplasm (GO:0005737);; Biological Process: response to red or far red light (GO:0009639);; Biological Process: gibberellin biosynthetic process (GO:0009686);; Biological Process: abscisic acid biosynthetic process (GO:0009688);; Biological Process: response to abscisic acid (GO:0009737);; Biological Process: gibberellic aci…	K05282|0.0|ath:AT5G51810|GA20OX2 (GIBBERELLIN 20 OXIDASE 2); gibberellin 20-oxidase (EC:1.14.11.12); K05282 gibberellin 20-oxidase [EC:1.14.11.12]	Gibberellin 20 oxidase 2 GN=MIO24.5 OS=Arabidopsis thaliana (Mouse-ear cress) PE=2 SV=1
		Bra028706	AT5G51810	up	Molecular Function: iron ion binding (GO:0005506);; Cellular Component: cytoplasm (GO:0005737);; Biological Process: fatty acid catabolic process (GO:0009062);; Biological Process: gibberellin biosynthetic process (GO:0009686);; Molecular Function: gibberellin 20-oxidase activity (GO:0045544);; Biological Process: oxidation-reduction process (GO:0055114);;	K05282|0.0|ath:AT5G07200|YAP169; YAP169; gibberellin 20-oxidase (EC:1.14.11.12); K05282 gibberellin 20-oxidase [EC:1.14.11.12]	Gibberellin 20 oxidase 3 GN=T28J14_140 OS=Arabidopsis thaliana (Mouse-ear cress) PE=2 SV=1
	Calcium sensors	Bra020035	AT5G19360	up	Molecular Function: calmodulin-dependent protein kinase activity (GO:0004683);; Molecular Function: calcium ion binding (GO:0005509);; Molecular Function: calmodulin binding (GO:0005516);; Molecular Function: ATP binding (GO:0005524);; Cellular Component: nucleus (GO:0005634);; Cellular Component: cytoplasm (GO:0005737);; Cellular Component: plasma membrane (GO:0005886);; Biological Process: absc…	K00924|0.0|ath:AT5G19360|CPK34; CPK34; ATP binding / calcium ion binding / calmodulin-dependent protein kinase/ kinase/ protein kinase/ protein serine/threonine kinase; K00924 [EC:2.7.1.-]	Calcium-dependent protein kinase 34 GN=CPK34 OS=Arabidopsis thaliana (Mouse-ear cress) PE=2 SV=1
		Bra029376	AT5G23580	down	Molecular Function: calmodulin-dependent protein kinase activity (GO:0004683);; Molecular Function: calcium ion binding (GO:0005509);; Molecular Function: calmodulin binding (GO:0005516);; Molecular Function: ATP binding (GO:0005524);; Cellular Component: nucleus (GO:0005634);; Cellular Component: cytoplasm (GO:0005737);; Cellular Component: plasma membrane (GO:0005886);; Biological Process: absc…	K13412|0.0|ath:AT5G23580|CDPK9; CDPK9 (CALMODULIN-LIKE DOMAIN PROTEIN KINASE 9); ATP binding / calcium ion binding / calmodulin-dependent protein kinase/ kinase/ protein kinase/ protein serine/threonine kinase; K13412 calcium-dependent protein kinase [EC:2.7.11.1]	Calcium-dependent protein kinase 12 GN=MQM1.15 OS=Arabidopsis thaliana (Mouse-ear cress) PE=1 SV=1
		Bra015727	AT1G76650	up	Molecular Function: calcium ion binding (GO:0005509);; Cellular Component: nucleus (GO:0005634);; Cellular Component: plasma membrane (GO:0005886);; Biological Process: response to wounding (GO:0009611);; Biological Process: response to fungus (GO:0009620);; Biological Process: jasmonic acid biosynthetic process (GO:0009695);; Biological Process: abscisic acid-activated signaling pathway (GO:0009…	K13448|2e-89|ath:AT1G76650|CML38; calcium-binding EF hand family protein; K13448 calcium-binding protein CML	Calcium-binding protein CML38 GN=CML38 OS=Arabidopsis thaliana (Mouse-ear cress) PE=2 SV=1
T01 vs T02	Auxin	Bra004530	AT2G46530	down	Molecular Function: transcription factor activity, sequence-specific DNA binding (GO:0003700);; Cellular Component: nucleus (GO:0005634);; Biological Process: regulation of transcription, DNA-templated (GO:0006355);; Biological Process: cell adhesion (GO:0007155);; Cellular Component: plasmodesma (GO:0009506);; Biological Process: response to ethylene (GO:0009723);; Biological Process: auxin-acti…	--	Auxin response factor 11 GN=ARF11 OS=Arabidopsis thaliana (Mouse-ear cress) PE=2 SV=3
		Bra039855	AT4G14550	down	Biological Process: polysaccharide biosynthetic process (GO:0000271);; Molecular Function: transcription factor activity, sequence-specific DNA binding (GO:0003700);; Cellular Component: nucleus (GO:0005634);; Biological Process: pattern specification process (GO:0007389);; Biological Process: regulation of cell size (GO:0008361);; Biological Process: response to desiccation (GO:0009269);; Biolog…	K14484|1e-137|ath:AT4G14550|IAA14; IAA14 (INDOLE-3-ACETIC ACID INDUCIBLE 14); protein binding / transcription factor/ transcription repressor	Auxin-responsive protein IAA14 OS=Arabidopsis thaliana (Mouse-ear cress) PE=1 SV=2
		Bra010354	AT4G28720	down	Molecular Function: N,N-dimethylaniline monooxygenase activity (GO:0004499);; Biological Process: brassinosteroid mediated signaling pathway (GO:0009742);; Biological Process: auxin biosynthetic process (GO:0009851);; Molecular Function: flavin adenine dinucleotide binding (GO:0050660);; Molecular Function: NADP binding (GO:0050661);; Biological Process: oxidation-reduction process (GO:0055114);;	K11816|0.0|ath:AT4G28720|flavin-containing monooxygenase family protein / FMO family protein	Probable indole-3-pyruvate monooxygenase YUCCA8 GN=F16A16.170 OS=Arabidopsis thaliana (Mouse-ear cress) PE=2 SV=1
		Bra011055	AT4G28720	down	Molecular Function: N,N-dimethylaniline monooxygenase activity (GO:0004499);; Biological Process: brassinosteroid mediated signaling pathway (GO:0009742);; Biological Process: auxin biosynthetic process (GO:0009851);; Molecular Function: flavin adenine dinucleotide binding (GO:0050660);; Molecular Function: NADP binding (GO:0050661);; Biological Process: oxidation-reduction process (GO:0055114);;	K11816|0.0|ath:AT4G28720|flavin-containing monooxygenase family protein / FMO family protein	Probable indole-3-pyruvate monooxygenase YUCCA8 GN=F16A16.170 OS=Arabidopsis thaliana (Mouse-ear cress) PE=2 SV=1
		Bra025774	AT1G19840	down	Cellular Component: mitochondrion (GO:0005739);; Biological Process: response to auxin (GO:0009733);;	K14488|2e-98|ath:AT1G19840|auxin-responsive family protein; K14488 SAUR family protein	Auxin-induced protein 6B OS=Glycine max (Soybean) PE=2 SV=1
		Bra002123	AT5G18080	down	Cellular Component: chloroplast, plasma membrane;; Biological Process: auxin-activated signaling pathway, multicellular organism development, regulation of growth	K14488|3e-45|ath:AT5G18080|auxin-responsive protein, putative; K14488 SAUR family protein	Auxin-induced protein X10A OS=Glycine max (Soybean) PE=2 SV=1
		Bra002131	AT5G18030	down	Cellular Component: mitochondrion, plasma membrane;; Biological Process:	auxin-activated signaling pathway, multicellular organism development, regulation of growth	Auxin-induced protein 15A OS=Glycine max (Soybean) PE=2 SV=1
		Bra006438	AT5G18030	down	Cellular Component: mitochondrion (GO:0005739);; Cellular Component: chloroplast (GO:0009507);; Biological Process: response to auxin (GO:0009733);;	K14488|1e-50|ath:AT5G18030|auxin-responsive protein, putative; K14488 SAUR family protein	Indole-3-acetic acid-induced protein ARG7 GN=ARG7 OS=Vigna radiata var. radiata (Mung bean) PE=2 SV=1
		Bra006434	AT5G18080	down	Cellular Component: chloroplast, plasma membrane;; Biological Process: auxin-activated signaling pathway, multicellular organism development, regulation of growth	K14488|3e-45|ath:AT5G18080|auxin-responsive protein, putative; K14488 SAUR family protein	Auxin-induced protein X10A OS=Glycine max (Soybean) PE=2 SV=1
		Bra019369	AT4G22620	down	Cellular Component: mitochondrion (GO:0005739);; Biological Process: response to auxin (GO:0009733);;	K14488|3e-88|ath:AT4G22620|auxin-responsive family protein; K14488 SAUR family protein	Indole-3-acetic acid-induced protein ARG7 GN=ARG7 OS=Vigna radiata var. radiata (Mung bean) PE=2 SV=1
		Bra023658	AT5G18080	down	Cellular Component: chloroplast, plasma membrane;; Biological Process: auxin-activated signaling pathway, multicellular organism development, regulation of growth	K14488|2e-45|ath:AT5G18080|auxin-responsive protein, putative; K14488 SAUR family protein	Auxin-induced protein X10A OS=Glycine max (Soybean) PE=2 SV=1
		Bra023662	AT5G18030	up	Cellular Component: mitochondrion, plasma membrane;; Biological Process:	auxin-activated signaling pathway, multicellular organism development, regulation of growth	Auxin-induced protein X10A OS=Glycine max (Soybean) PE=2 SV=1
		Bra023661	AT5G18020	up	--	K14488|4e-52|ath:AT5G18020|auxin-responsive protein, putative; K14488 SAUR family protein	Auxin-induced protein 15A OS=Glycine max (Soybean) PE=2 SV=1
		Bra024482	AT2G18010	up	Biological Process: response to auxin (GO:0009733);;	K14488|1e-59|ath:AT2G18010|auxin-responsive family protein; K14488 SAUR family protein	Indole-3-acetic acid-induced protein ARG7 GN=ARG7 OS=Vigna radiata var. radiata (Mung bean) PE=2 SV=1
		Bra023656	AT5G18030	up	Cellular Component: mitochondrion, plasma membrane;; Biological Process:	auxin-activated signaling pathway, multicellular organism development, regulation of growth	Auxin-induced protein 15A OS=Glycine max (Soybean) PE=2 SV=1
		Bra008207	AT1G75580	up	Biological Process: response to auxin (GO:0009733);;	K14488|2e-61|ath:AT1G75580|auxin-responsive protein, putative; K14488 SAUR family protein	Auxin-induced protein X10A OS=Glycine max (Soybean) PE=2 SV=1
		Bra008971	AT5G11320	up	Cellular Component: Golgi membrane (GO:0000139);; Molecular Function: N,N-dimethylaniline monooxygenase activity (GO:0004499);; Cellular Component: nucleoplasm (GO:0005654);; Cellular Component: endoplasmic reticulum membrane (GO:0005789);; Cellular Component: cytosol (GO:0005829);; Cellular Component: chloroplast (GO:0009507);; Biological Process: auxin biosynthetic process (GO:0009851);; Biolog…	K11816|0.0|ath:AT5G11320|YUC4; YUC4 (YUCCA4); monooxygenase/ oxidoreductase; K11816 YUCCA family monooxygenase [EC:1.14.13.-]	Probable indole-3-pyruvate monooxygenase YUCCA4 GN=F2I11_210 OS=Arabidopsis thaliana (Mouse-ear cress) PE=1 SV=1
		Bra031718	AT5G51470	down	--	K14487|0.0|ath:AT5G51470|auxin-responsive GH3 family protein; K14487 auxin responsive GH3 gene family	4-substituted benzoates-glutamate ligase GH3.12 OS=Arabidopsis thaliana (Mouse-ear cress) PE=1 SV=1
		Bra023403	AT5G13320	down	Biological Process: MAPK cascade (GO:0000165);; Biological Process: response to molecule of bacterial origin (GO:0002237);; Biological Process: respiratory burst involved in defense response (GO:0002679);; Cellular Component: cytoplasm (GO:0005737);; Biological Process: regulation of transcription, DNA-templated (GO:0006355);; Biological Process: protein targeting to membrane (GO:0006612);; Biolo…	K14487|0.0|ath:AT5G13320|PBS3; PBS3 (AVRPPHB SUSCEPTIBLE 3); K14487 auxin responsive GH3 gene family	4-substituted benzoates-glutamate ligase GH3.12 OS=Arabidopsis thaliana (Mouse-ear cress) PE=1 SV=1
		Bra022725	AT5G54510	down	Cellular Component: chloroplast (GO:0009507);; Biological Process: auxin-activated signaling pathway (GO:0009734);; Biological Process: unidimensional cell growth (GO:0009826);; Biological Process: auxin homeostasis (GO:0010252);; Molecular Function: indole-3-acetic acid amido synthetase activity (GO:0010279);; Biological Process: response to cyclopentenone (GO:0010583);; Biological Process: posi…	K14487|0.0|ath:AT5G54510|DFL1; DFL1 (DWARF IN LIGHT 1); indole-3-acetic acid amido synthetase; K14487 auxin responsive GH3 gene family	Indole-3-acetic acid-amido synthetase GH3.6 GN=F24B18.13 OS=Arabidopsis thaliana (Mouse-ear cress) PE=1 SV=1
		Bra032876	AT1G28130	down	Cellular Component: nucleus (GO:0005634);; Cellular Component: cytoplasm (GO:0005737);; Biological Process: response to auxin (GO:0009733);; Biological Process: auxin homeostasis (GO:0010252);; Molecular Function: indole-3-acetic acid amido synthetase activity (GO:0010279);; Biological Process: brassinosteroid biosynthetic process (GO:0016132);;	K14487|0.0|ath:AT1G28130|GH3.17; GH3.17; indole-3-acetic acid amido synthetase; K14487 auxin responsive GH3 gene family	Indole-3-acetic acid-amido synthetase GH3.17 OS=Arabidopsis thaliana (Mouse-ear cress) PE=1 SV=1
	Ethylene	Bra030989	AT1G17440	up	Biological Process: RNA splicing, via endonucleolytic cleavage and ligation (GO:0000394);; Cellular Component: transcription factor TFIID complex (GO:0005669);; Biological Process: DNA-templated transcription, initiation (GO:0006352);; Biological Process: transcription from RNA polymerase II promoter (GO:0006366);; Biological Process: cytokinin-activated signaling pathway (GO:0009736);; Biologica…	K03126|0.0|ath:AT1G17440|EER4; EER4 (ENHANCED ETHYLENE RESPONSE 4); DNA binding / transcription initiation factor	Transcription initiation factor TFIID subunit 12b GN=TAF12B OS=Arabidopsis thaliana (Mouse-ear cress) PE=1 SV=1
		Bra017493	AT5G47230	down	Biological Process: respiratory burst involved in defense response (GO:0002679);; Molecular Function: DNA binding (GO:0003677);; Molecular Function: transcription factor activity, sequence-specific DNA binding (GO:0003700);; Cellular Component: nucleus (GO:0005634);; Biological Process: response to cold (GO:0009409);; Biological Process: ethylene-activated signaling pathway (GO:0009873);; Biologi…	K09286|1e-151|ath:AT5G47230|ERF5; ERF5 (ETHYLENE RESPONSIVE ELEMENT BINDING FACTOR 5); DNA binding / transcription activator/ transcription factor; K09286 EREBP-like factor	Ethylene-responsive transcription factor 5 GN=MQL5_9 OS=Arabidopsis thaliana (Mouse-ear cress) PE=2 SV=1
		Bra017495	AT5G47220	down	Biological Process: vasculature development (GO:0001944);; Biological Process: respiratory burst involved in defense response (GO:0002679);; Molecular Function: DNA binding (GO:0003677);; Molecular Function: transcription factor activity, sequence-specific DNA binding (GO:0003700);; Cellular Component: nucleus (GO:0005634);; Biological Process: ethylene biosynthetic process (GO:0009693);; Biologi…	K14517|4e-99|ath:AT5G47220|ERF2; ERF2 (ETHYLENE RESPONSIVE ELEMENT BINDING FACTOR 2); DNA binding / transcription activator/ transcription factor; K14517 ethylene-responsive transcription factor 2	Ethylene-responsive transcription factor 2 GN=MQL5.7 OS=Arabidopsis thaliana (Mouse-ear cress) PE=2 SV=1
		Bra027270	AT3G15210	up	Biological Process: respiratory burst involved in defense response (GO:0002679);; Molecular Function: DNA binding (GO:0003677);; Molecular Function: transcription factor activity, sequence-specific DNA binding (GO:0003700);; Molecular Function: protein binding (GO:0005515);; Biological Process: response to abscisic acid (GO:0009737);; Biological Process: induced systemic resistance, jasmonic acid…	K09286|3e-85|ath:AT3G15210|ERF4; ERF4 (ETHYLENE RESPONSIVE ELEMENT BINDING FACTOR 4); DNA binding / protein binding / transcription factor/ transcription repressor; K09286 EREBP-like factor	Ethylene-responsive transcription factor 4 GN=At3g15210 OS=Arabidopsis thaliana (Mouse-ear cress) PE=1 SV=1
		Bra021594	AT3G15210	up	Biological Process: respiratory burst involved in defense response (GO:0002679);; Molecular Function: DNA binding (GO:0003677);; Molecular Function: transcription factor activity, sequence-specific DNA binding (GO:0003700);; Molecular Function: protein binding (GO:0005515);; Biological Process: response to abscisic acid (GO:0009737);; Biological Process: induced systemic resistance, jasmonic acid…	K09286|1e-111|ath:AT3G15210|ERF4; ERF4 (ETHYLENE RESPONSIVE ELEMENT BINDING FACTOR 4); DNA binding / protein binding / transcription factor/ transcription repressor; K09286 EREBP-like factor	Ethylene-responsive transcription factor 4 GN=At3g15210 OS=Arabidopsis thaliana (Mouse-ear cress) PE=1 SV=1
		Bra024953	AT5G47230	down	Biological Process: respiratory burst involved in defense response (GO:0002679);; Molecular Function: DNA binding (GO:0003677);; Molecular Function: transcription factor activity, sequence-specific DNA binding (GO:0003700);; Cellular Component: nucleus (GO:0005634);; Biological Process: response to cold (GO:0009409);; Biological Process: ethylene-activated signaling pathway (GO:0009873);; Biologi…	K09286|1e-142|ath:AT5G47230|ERF5; ERF5 (ETHYLENE RESPONSIVE ELEMENT BINDING FACTOR 5); DNA binding / transcription activator/ transcription factor; K09286 EREBP-like factor	Ethylene-responsive transcription factor 5 GN=MQL5_9 OS=Arabidopsis thaliana (Mouse-ear cress) PE=2 SV=1
	Abscisic acid	Bra005853	AT5G05440	down	Molecular Function: receptor activity (GO:0004872);; Molecular Function: protein binding (GO:0005515);; Cellular Component: nucleus (GO:0005634);; Cellular Component: cytoplasm (GO:0005737);; Biological Process: abscisic acid-activated signaling pathway (GO:0009738);; Molecular Function: abscisic acid binding (GO:0010427);;	K14496|1e-137|ath:AT5G05440|hypothetical protein; K14496 abscisic acid receptor PYR/PYL family	Abscisic acid receptor PYL5 GN=K18I23.25 OS=Arabidopsis thaliana (Mouse-ear cress) PE=1 SV=1
		Bra009113	AT5G05440	down	Molecular Function: receptor activity (GO:0004872);; Molecular Function: protein binding (GO:0005515);; Cellular Component: nucleus (GO:0005634);; Cellular Component: cytoplasm (GO:0005737);; Biological Process: abscisic acid-activated signaling pathway (GO:0009738);; Molecular Function: abscisic acid binding (GO:0010427);;	K14496|1e-144|ath:AT5G05440|hypothetical protein; K14496 abscisic acid receptor PYR/PYL family	Abscisic acid receptor PYL5 GN=K18I23.25 OS=Arabidopsis thaliana (Mouse-ear cress) PE=1 SV=1
		Bra026299	AT4G27920	up	Molecular Function: protein phosphatase inhibitor activity (GO:0004864);; Molecular Function: receptor activity (GO:0004872);; Cellular Component: nucleus (GO:0005634);; Cellular Component: mitochondrion (GO:0005739);; Biological Process: positive regulation of abscisic acid-activated signaling pathway (GO:0009789);; Molecular Function: abscisic acid binding (GO:0010427);; Molecular Function: pro…	K14496|1e-105|ath:AT4G27920|hypothetical protein; K14496 abscisic acid receptor PYR/PYL family	Abscisic acid receptor PYL10 GN=T13J8.30 OS=Arabidopsis thaliana (Mouse-ear cress) PE=1 SV=1
		Bra028758	AT5G05440	up	Molecular Function: receptor activity (GO:0004872);; Molecular Function: protein binding (GO:0005515);; Cellular Component: nucleus (GO:0005634);; Cellular Component: cytoplasm (GO:0005737);; Biological Process: abscisic acid-activated signaling pathway (GO:0009738);; Molecular Function: abscisic acid binding (GO:0010427);;	K14496|1e-111|ath:AT5G05440|hypothetical protein; K14496 abscisic acid receptor PYR/PYL family	Abscisic acid receptor PYL5 GN=K18I23.25 OS=Arabidopsis thaliana (Mouse-ear cress) PE=1 SV=1
		Bra018398	AT2G29380	up	Molecular Function: protein serine/threonine phosphatase activity (GO:0004722);; Cellular Component: plasma membrane (GO:0005886);; Biological Process: protein dephosphorylation (GO:0006470);; Biological Process: negative regulation of abscisic acid-activated signaling pathway (GO:0009788);; Biological Process: positive regulation of gibberellic acid mediated signaling pathway (GO:0009939);; Biol…	K14497|0.0|ath:AT2G29380|protein phosphatase 2C, putative / PP2C, putative; K14497 protein phosphatase 2C [EC:3.1.3.16]	Probable protein phosphatase 2C 24 GN=At2g29380 OS=Arabidopsis thaliana (Mouse-ear cress) PE=2 SV=1
	Jasmonic acid	Bra030986	AT1G17380	up	Molecular Function: protein binding (GO:0005515);; Cellular Component: nucleus (GO:0005634);; Biological Process: transcription, DNA-templated (GO:0006351);; Biological Process: response to water deprivation (GO:0009414);; Biological Process: response to wounding (GO:0009611);; Biological Process: response to fungus (GO:0009620);; Biological Process: ethylene biosynthetic process (GO:0009693);; B…	K13464|1e-126|ath:AT1G17380|JAZ5; JAZ5 (JASMONATE-ZIM-DOMAIN PROTEIN 5); K13464 jasmonate ZIM domain-containing protein	Protein TIFY 11A OS=Arabidopsis thaliana (Mouse-ear cress) PE=1 SV=1
		Bra008846	AT5G13220	up	Cellular Component: nucleus (GO:0005634);; Biological Process: regulation of transcription, DNA-templated (GO:0006355);; Biological Process: response to water deprivation (GO:0009414);; Biological Process: response to wounding (GO:0009611);; Biological Process: response to fungus (GO:0009620);; Biological Process: jasmonic acid biosynthetic process (GO:0009695);; Biological Process: response to e…	K13464|4e-70|ath:AT5G13220|JAZ10; JAZ10 (JASMONATE-ZIM-DOMAIN PROTEIN 10); K13464 jasmonate ZIM domain-containing protein	Protein TIFY 9 GN=T31B5.40 OS=Arabidopsis thaliana (Mouse-ear cress) PE=1 SV=1
		Bra025977	AT1G17380	down	Molecular Function: protein binding (GO:0005515);; Cellular Component: nucleus (GO:0005634);; Biological Process: response to water deprivation (GO:0009414);; Biological Process: response to wounding (GO:0009611);; Biological Process: response to fungus (GO:0009620);; Biological Process: ethylene biosynthetic process (GO:0009693);; Biological Process: jasmonic acid biosynthetic process (GO:000969…	K13464|1e-104|ath:AT1G17380|JAZ5; JAZ5 (JASMONATE-ZIM-DOMAIN PROTEIN 5); K13464 jasmonate ZIM domain-containing protein	Protein TIFY 11A OS=Arabidopsis thaliana (Mouse-ear cress) PE=1 SV=1
		Bra025753	AT1G19640	up	Cellular Component: nucleus (GO:0005634);; Cellular Component: cytoplasm (GO:0005737);; Biological Process: protein targeting to membrane (GO:0006612);; Biological Process: response to water deprivation (GO:0009414);; Biological Process: response to wounding (GO:0009611);; Biological Process: response to fungus (GO:0009620);; Biological Process: jasmonic acid biosynthetic process (GO:0009695);; B…	K08241|0.0|ath:AT1G19640|JMT; JMT (JASMONIC ACID CARBOXYL METHYLTRANSFERASE); jasmonate O-methyltransferase; K08241 jasmonate O-methyltransferase [EC:2.1.1.141]	Jasmonate O-methyltransferase GN=JMT OS=Brassica rapa subsp. pekinensis (Chinese cabbage) PE=1 SV=1
	Gibberellin	Bra015820	AT1G75750	down	Biological Process: polysaccharide biosynthetic process (GO:0000271);; Cellular Component: extracellular region (GO:0005576);; Biological Process: tryptophan catabolic process (GO:0006569);; Cellular Component: plant-type cell wall (GO:0009505);; Biological Process: indoleacetic acid biosynthetic process (GO:0009684);; Biological Process: response to abscisic acid (GO:0009737);; Biological Proces…	--	Gibberellin-regulated protein 1 (Precursor) GN=GASA1 OS=Arabidopsis thaliana (Mouse-ear cress) PE=2 SV=2
		Bra009285	AT1G19640	down	Molecular Function: iron ion binding (GO:0005506);; Cellular Component: cytoplasm (GO:0005737);; Biological Process: fatty acid catabolic process (GO:0009062);; Biological Process: gibberellin biosynthetic process (GO:0009686);; Molecular Function: gibberellin 20-oxidase activity (GO:0045544);; Biological Process: oxidation-reduction process (GO:0055114);;	K05282|0.0|ath:c|YAP169; YAP169; gibberellin 20-oxidase (EC:1.14.11.12); K05282 gibberellin 20-oxidase [EC:1.14.11.12]	Gibberellin 20 oxidase 3 GN=T28J14_140 OS=Arabidopsis thaliana (Mouse-ear cress) PE=2 SV=1
		Bra030187	AT2G34555	down	Molecular Function: iron ion binding (GO:0005506);; Cellular Component: cytoplasm (GO:0005737);; Biological Process: gibberellin biosynthetic process (GO:0009686);; Biological Process: jasmonic acid metabolic process (GO:0009694);; Biological Process: response to jasmonic acid (GO:0009753);; Biological Process: response to red light (GO:0010114);; Biological Process: gibberellin catabolic process…	K04125|1e-164|ath:AT2G34555|ATGA2OX3 (gibberellin 2-oxidase 3); gibberellin 2-beta-dioxygenase (EC:1.14.11.13); K04125 gibberellin 2-oxidase [EC:1.14.11.13]	Gibberellin 2-beta-dioxygenase 2 GN=GA2OX2 OS=Arabidopsis thaliana (Mouse-ear cress) PE=2 SV=1
		Bra013512	AT4G21200	down	Cellular Component: cytoplasm (GO:0005737);; Biological Process: gibberellin biosynthetic process (GO:0009686);; Molecular Function: metal ion binding (GO:0046872);; Molecular Function: C-19 gibberellin 2-beta-dioxygenase activity (GO:0052634);; Molecular Function: C-20 gibberellin 2-beta-dioxygenase activity (GO:0052635);; Biological Process: oxidation-reduction process (GO:0055114);;	--	Gibberellin 2-beta-dioxygenase 8 GN=GA2OX8 OS=Arabidopsis thaliana (Mouse-ear cress) PE=1 SV=2
		Bra032354	AT2G34555	down	Molecular Function: iron ion binding (GO:0005506);; Cellular Component: cytoplasm (GO:0005737);; Biological Process: gibberellin biosynthetic process (GO:0009686);; Biological Process: jasmonic acid metabolic process (GO:0009694);; Biological Process: response to jasmonic acid (GO:0009753);; Biological Process: response to red light (GO:0010114);; Biological Process: gibberellin catabolic process…	K04125|1e-168|ath:AT2G34555|ATGA2OX3 (gibberellin 2-oxidase 3); gibberellin 2-beta-dioxygenase (EC:1.14.11.13); K04125 gibberellin 2-oxidase [EC:1.14.11.13]	Gibberellin 2-beta-dioxygenase 2 GN=GA2OX2 OS=Arabidopsis thaliana (Mouse-ear cress) PE=2 SV=1
		Bra008480	AT1G80340	down	Molecular Function: iron ion binding (GO:0005506);; Cellular Component: cytoplasm (GO:0005737);; Biological Process: fatty acid beta-oxidation (GO:0006635);; Biological Process: peroxisome organization (GO:0007031);; Molecular Function: transcription factor binding (GO:0008134);; Biological Process: photomorphogenesis (GO:0009640);; Biological Process: gibberellin biosynthetic process (GO:0009686…	K04124|0.0|ath:AT1G80340|GA3OX2; GA3OX2 (GIBBERELLIN 3-OXIDASE 2); gibberellin 3-beta-dioxygenase (EC:1.14.11.15); K04124 gibberellin 3-beta-dioxygenase [EC:1.14.11.15]	Gibberellin 3-beta-dioxygenase 2 GN=F5I6.9 OS=Arabidopsis thaliana (Mouse-ear cress) PE=1 SV=2
	Calcium sensors	Bra038149	AT5G66210	up	Molecular Function: calmodulin-dependent protein kinase activity (GO:0004683);; Molecular Function: calcium ion binding (GO:0005509);; Molecular Function: calmodulin binding (GO:0005516);; Molecular Function: ATP binding (GO:0005524);; Cellular Component: nucleus (GO:0005634);; Cellular Component: plasma membrane (GO:0005886);; Cellular Component: chloroplast (GO:0009507);; Biological Process: ab…	--	Calcium-dependent protein kinase 28 GN=CPK28 OS=Arabidopsis thaliana (Mouse-ear cress) PE=1 SV=1
		Bra031055	AT1G18890	up	Biological Process: MAPK cascade (GO:0000165);; Molecular Function: calmodulin-dependent protein kinase activity (GO:0004683);; Molecular Function: calcium ion binding (GO:0005509);; Molecular Function: calmodulin binding (GO:0005516);; Molecular Function: ATP binding (GO:0005524);; Cellular Component: nucleus (GO:0005634);; Cellular Component: cytoplasm (GO:0005737);; Cellular Component: plasma …	K13412|0.0|ath:AT1G18890|ATCDPK1 (CALCIUM-DEPENDENT PROTEIN KINASE 1); calmodulin-dependent protein kinase/ kinase/ protein kinase; K13412 calcium-dependent protein kinase [EC:2.7.11.1]	Calcium-dependent protein kinase 10 GN=F6A14.1 OS=Arabidopsis thaliana (Mouse-ear cress) PE=1 SV=1

## Sheet: Table S2
Table S2. Sequencing results of specific gene
Gene_name	Gene_ID	Hormologous gene in Arabidopsis	Information	GO_annotation	KEGG_annotation	Swissprot_annotation
BrCKL8	Bra035974	AT5G43320	up	Molecular Function: protein serine/threonine kinase activity (GO:0004674);; Molecular Function: ATP binding (GO:0005524);; Cellular Component: nucleus (GO:0005634);; Cellular Component: cytoplasm (GO:0005737);; Biological Process: protein targeting to vacuole (GO:0006623);; Biological Process: endocytosis (GO:0006897);; Biological Process: regulation of cell shape (GO:0008360);; Biological Proces…	K00924|0.0|ath:AT5G43320|ckl8; ckl8 (Casein Kinase I-like 8); ATP binding / kinase/ protein kinase/ protein serine/threonine kinase; K00924 [EC:2.7.1.-]	Casein kinase I isoform delta-like GN=At4g26100 OS=Arabidopsis thaliana (Mouse-ear cress) PE=2 SV=2
BrYUCCA5	Bra036002	AT5G43890	up	Molecular Function: N,N-dimethylaniline monooxygenase activity (GO:0004499);; Biological Process: response to brassinosteroid (GO:0009741);; Biological Process: auxin biosynthetic process (GO:0009851);; Molecular Function: flavin adenine dinucleotide binding (GO:0050660);; Molecular Function: NADP binding (GO:0050661);; Biological Process: oxidation-reduction process (GO:0055114);;	K11816|0.0|ath:AT5G43890|YUC5; YUCCA5; monooxygenase; K11816 YUCCA family monooxygenase [EC:1.14.13.-]	Probable indole-3-pyruvate monooxygenase YUCCA5 GN=F6B6.3 OS=Arabidopsis thaliana (Mouse-ear cress) PE=2 SV=1
BrCBL9	Bra022104	AT5G47100	up	Biological Process: MAPK cascade (GO:0000165);; Molecular Function: calcium ion binding (GO:0005509);; Cellular Component: cytoplasm (GO:0005737);; Cellular Component: plasma membrane (GO:0005886);; Biological Process: protein targeting to membrane (GO:0006612);; Biological Process: response to water deprivation (GO:0009414);; Biological Process: response to wounding (GO:0009611);; Biological Pro…	K06268|1e-148|ath:AT5G47100|CBL9; CBL9; calcium ion binding; K06268 protein phosphatase 3, regulatory subunit	Calcineurin B-like protein 9 GN=CBL9 OS=Arabidopsis thaliana (Mouse-ear cress) PE=1 SV=3
BrMYB51	Bra016553	AT1G18570	down	Biological Process: MAPK cascade (GO:0000165);; Molecular Function: DNA binding (GO:0003677);; Molecular Function: chromatin binding (GO:0003682);; Molecular Function: transcription factor activity, sequence-specific DNA binding (GO:0003700);; Cellular Component: nucleus (GO:0005634);; Biological Process: regulation of transcription, DNA-templated (GO:0006355);; Biological Process: protein target…	K09422|0.0|ath:AT1G18570|MYB51; MYB51 (MYB DOMAIN PROTEIN 51); DNA binding / transcription factor; K09422 myb proto-oncogene protein, plant	Transcription factor MYB51 GN=F25I16.9 OS=Arabidopsis thaliana (Mouse-ear cress) PE=1 SV=2
BrSAUR46	Bra017211	AT2G37030	up	Biological Process: response to auxin (GO:0009733);;	K14488|1e-65|ath:AT2G37030|auxin-responsive family protein; K14488 SAUR family protein	Indole-3-acetic acid-induced protein ARG7 GN=ARG7 OS=Vigna radiata var. radiata (Mung bean) PE=2 SV=1
BrGH3.5	Bra026365	AT4G27260	down	Cellular Component: chloroplast (GO:0009507);; Biological Process: auxin-activated signaling pathway (GO:0009734);; Biological Process: unidimensional cell growth (GO:0009826);; Biological Process: auxin homeostasis (GO:0010252);; Molecular Function: indole-3-acetic acid amido synthetase activity (GO:0010279);; Biological Process: response to cyclopentenone (GO:0010583);; Biological Process: posi…	K14487|0.0|ath:AT4G27260|WES1; WES1; indole-3-acetic acid amido synthetase; K14487 auxin responsive GH3 gene family	Indole-3-acetic acid-amido synthetase GH3.5 GN=GH3.5 OS=Arabidopsis thaliana (Mouse-ear cress) PE=1 SV=1
BrIAA30	Bra007661	AT3G62100	up	Molecular Function: transcription factor activity, sequence-specific DNA binding (GO:0003700);; Cellular Component: nucleus (GO:0005634);; Biological Process: regulation of transcription, DNA-templated (GO:0006355);; Biological Process: gravitropism (GO:0009630);; Biological Process: auxin-activated signaling pathway (GO:0009734);; Biological Process: somatic embryogenesis (GO:0010262);; Biologic…	K14484|1e-109|ath:AT3G62100|IAA30; IAA30 (INDOLE-3-ACETIC ACID INDUCIBLE 30); transcription factor	Auxin-responsive protein IAA30 GN=IAA30 OS=Arabidopsis thaliana (Mouse-ear cress) PE=2 SV=1
BrMYB1	Bra022127	AT5G47390	up	Biological Process: negative regulation of transcription from RNA polymerase II promoter (GO:0000122);; Molecular Function: transcription regulatory region sequence-specific DNA binding (GO:0000976);; Molecular Function: chromatin binding (GO:0003682);; Molecular Function: transcription factor activity, sequence-specific DNA binding (GO:0003700);; Cellular Component: nucleus (GO:0005634);; Molecu…	--	Transcription factor MYB1R1 OS=Solanum tuberosum (Potato) PE=2 SV=1
